# Supplementary material for: Unveiling the Potential of Corn Cob Biochar: Analysis of Microstructure and Composition with Emphasis on Interaction with NO2
Source: MDPI journal article supplement (doi:10.3390/ma17010159), 2023-12-28
Supplement: s1 [file s1]

## Supplementary Materials

# Unveiling the potential of corncob biochar: Analysis of microstructure and composition with emphasis on interaction with NO<sub>2</sub>

Méghane Drané<sup>1,2</sup>, Mohamed Zbair<sup>1,2</sup>, Samar Hajjar-Garreau<sup>1,2</sup>, Ludovic Josien<sup>1,2</sup>, Laure Michelin<sup>1,2</sup>, Simona Bennici<sup>1,2</sup>, Lionel Limousy<sup>1,2,\*</sup>

<sup>1</sup> Université de Haute-alsace, CNRS, IS2M UMR 7361, F-68100 Mulhouse, France ;

<sup>2</sup> Université de Strasbourg, France

\* Correspondence: lionel.limousy@uha.fr ; Tel.: +33 (0)3 89 60 87 05

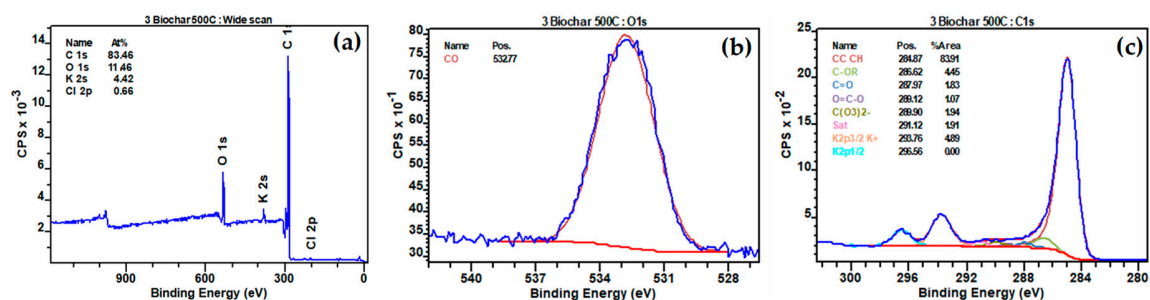

**Figure S1.** (a) Full range XPS spectra of biochar prepared at 500°C before interaction with N<sub>2</sub>; (b) high-resolution fitted XPS O1s; (c) high-resolution fitted XPS C1s.

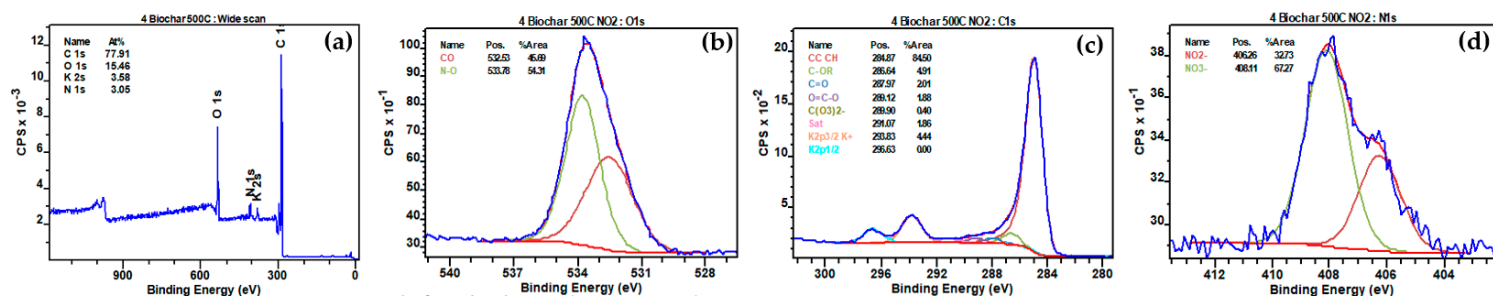

**Figure S2.** (a) Full range XPS spectra of biochar prepared at 500°C after interaction with NO<sub>2</sub>; (b) high-resolution fitted XPS O1s; (c) high-resolution fitted XPS C1s; (d) high-resolution fitted XPS N1s.

## Supplementary Materials

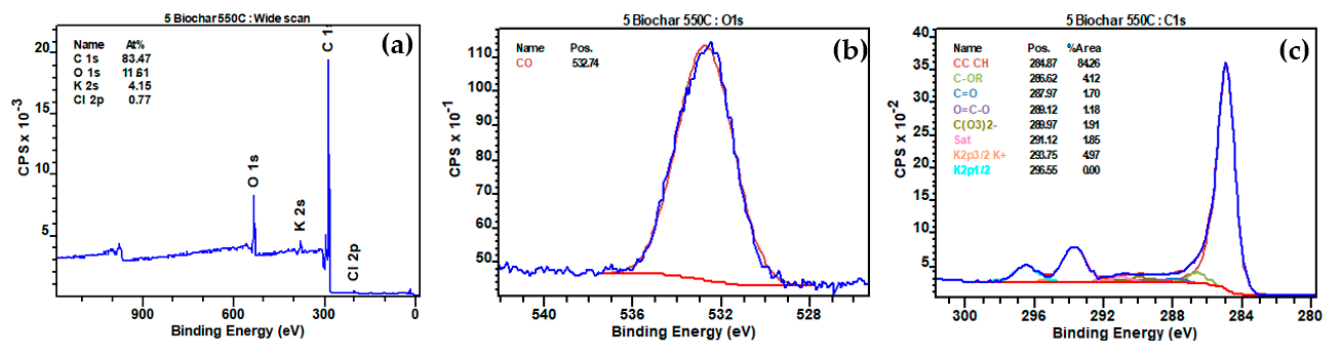

**Figure S3.** (a) Full range XPS spectra of biochar prepared at 550°C before interaction with N<sub>2</sub>; (b) high-resolution fitted XPS O1s; (c) high-resolution fitted XPS C1s.

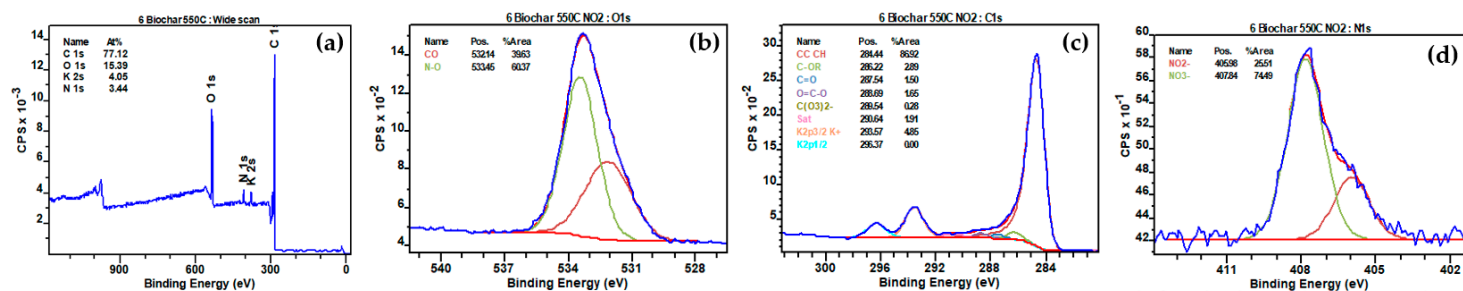

**Figure S4.** (a) Full range XPS spectra of biochar prepared at 550°C after interaction with N<sub>2</sub>; (b) high-resolution fitted XPS O1s; (c) high-resolution fitted XPS C1s; (d) high-resolution fitted XPS N1s.
